# Supplementary material
Source: PubMed Central journal article supplement (PMC8050458)
Supplement: 2893_tables.pdf [file 2893_tables.pdf]

**On-line Table 1: Clinical Demographics**

| Patient | Sex/Age | Indication for MR Imaging                                             | Time between Exams (months)                        |     | MRI with SWI | MRI with T2* GRE | SWI: Field Strength (T) |
|---------|---------|-----------------------------------------------------------------------|----------------------------------------------------|-----|--------------|------------------|-------------------------|
|         |         |                                                                       | "0": Time of Reference Exam with SWI               | SWI |              |                  |                         |
| 1       | M/37    | Hemorrhage of cavernous malformation right basal ganglia (follow-up)  | -10/ -7/ -4/ 0                                     |     | 1            | 2                | 1.5                     |
| 2       | F/68    | Aphasia, right hand paresis – transient ischemic attack               | n/a                                                |     | 1            | n/a              | 3                       |
| 3       | M/39    | Subarachnoid hemorrhage                                               | -10 (CT*)/ 0                                       |     | 1            | n/a              | 1.5                     |
| 4       | F/73    | Fluctuating sensorineural hearing loss                                | -3/ 0                                              |     | 1            | n/a              | 1.5                     |
| 5       | M/66    | Melanocytoma right orbit                                              | 0/ +4/ +9/ +15                                     |     | 1            | n/a              | 1.5                     |
| 6       | F/41    | Pituitary macroadenoma                                                | -64/ -59/ -13/ -6/ 0/ +5                           |     | 1            | n/a              | 1.5                     |
| 7       | M/33    | Migraine                                                              | n/a                                                |     | 1            | n/a              | 3                       |
| 8       | F/44    | Headache, possibly migraine                                           | -7/ 0                                              |     | 1            | 1                | 3                       |
| 9       | F/34    | Neuro-Behcet (follow-up)                                              | -15/ -14/ -13/ -11/ -6/ 0/ +4/ +7/ +14             |     | 2            | 2                | 3                       |
| 10      | M/60    | Atlantodental osteoarthritis                                          | -37/ -36/ -6/ 0                                    |     | 1            | n/a              | 3                       |
| 11      | F/42    | Dizziness and migraine                                                | n/a                                                |     | 1            | n/a              | 3                       |
| 12      | F/46    | Vertigo, Horner syndrome—brain stem stroke                            | n/a                                                |     | 1            | n/a              | 1.5                     |
| 13      | F/72    | Slowly progressive aphasia                                            | -2/ 0                                              |     | 1            | 1                | 3                       |
| 14      | F/69    | Cognitive deficits and depression, bilateral breast carcinoma         | n/a                                                |     | 1            | n/a              | 3                       |
| 15      | F/43    | Migraine                                                              | -115/ 0                                            |     | 1            | n/a              | 3                       |
| 16      | F/47    | Vertebral artery dissection, Wallenberg syndrome, brain stem ischemia | 0/ +11                                             |     | 1            | n/a              | 3                       |
| 17      | F/36    | Right facial dysesthesia, occipital headache                          | -7/ 0                                              |     | 2            | n/a              | 1.5                     |
| 18      | M/44    | PTLD with brain involvement after renal transplant (follow-up)        | -35/ -33/ -30/ -27/ -25/ -23/ -20/ -16/ -12/ -7/ 0 |     | 2            | n/a              | 1.5                     |
| 19      | F/31    | Lymphangioleniomyomatosis                                             | n/a                                                |     | 1            | n/a              | 1.5                     |
| 20      | M/76    | Left hemiparesis, stroke right middle cerebral artery                 | n/a                                                |     | 1            | n/a              | 1.5                     |
| 21      | M/6     | Paresis cranial nerves III/VI, oligodendroglioma right occipital lobe | 0/ +2                                              |     | 1            | n/a              | 3                       |
| 22      | F/43    | Follow-up of enhancing pontine lesion                                 | -35/ -33/ -30/ -24/ 0                              |     | 1            | 2                | 1.5                     |
| 23      | F/64    | Chronic meningitis, follow-up                                         | -14/ -10/ -9/ -7/ -3/ 0                            |     | 1            | n/a              | 1.5                     |
| 24      | F/85    | Transient right hemiparesis, embolic stroke                           | n/a                                                |     | 1            | n/a              | 3                       |
| 25      | M/31    | Transient left incomplete ophthalmoplegia                             | -15/ 0                                             |     | 1            | n/a              | 1.5                     |
| 26      | F/65    | Spastic paraparesis, cervical myelopathy                              | n/a                                                |     | 1            | n/a              | 3                       |
| 27      | F/86    | Bilateral arm weakness, possible transient ischemic attack            | -95/ 0                                             |     | 1            | n/a              | 3                       |

**Note:**—n/a indicates not available; PTLD, post-transplant lymphoproliferative disorder.

**On-line Table 2: MR imaging characteristics of BCTs: location, size, presence of a prominent vessel, and MR signal intensity**

| Patient | Location              | Size (mm) T1 | Size (mm) | Prominent | DWI       | ADC       | T1  | T2 | FLAIR | SWI | Enhancement |
|---------|-----------------------|--------------|-----------|-----------|-----------|-----------|-----|----|-------|-----|-------------|
|         |                       | Postcontrast | SWI       | Vessel    |           |           |     |    |       |     |             |
| 1       | Lower pons            | 4.5          | 4.5       | No        | ±         | ±         | ±   | +  | +     | -   | +           |
| 1       | Lower pons            | 2.5          | 2         | No        | ±         | ±         | ±   | ±  | ±     | -   | +           |
| 1       | Mid pons              | 1.5          | 1.5       | No        | ±         | ±         | ±   | ±  | ±     | -   | +           |
| 1       | Cingulate gyrus       | 3            | 3         | No        | ±         | ±         | ±   | ±  | ±     | -   | +           |
| 2       | Lower pons            | 5            | 4.5       | No        | ±         | ±         | N/A | ±  | N/A   | -   | +           |
| 3       | Lower pons            | 4            | 5         | Yes       | -         | ±         | ±   | ±  | ±     | -   | +           |
| 3       | Mid pons              | 2            | 3         | Yes       | -         | ±         | ±   | ±  | ±     | -   | +           |
| 4       | Upper pons            | 6            | 7         | Yes       | -         | +         | ±   | +  | ±     | -   | +           |
| 4       | Upper pons            | 3            | 5         | No        | -         | +         | ±   | ±  | ±     | -   | +           |
| 5       | Substantia innominata | 5            | 5         | No        | N/A       | N/A       | ±   | ±  | N/A   | -   | +           |
| 6       | Mid pons              | 4            | 4         | Yes       | N/A       | N/A       | ±   | ±  | N/A   | -   | +           |
| 7       | Cingulate gyrus       | 5            | 4.5       | No        | -         | ±         | -   | ±  | ±     | -   | +           |
| 8       | Upper pons            | 11           | 12        | Yes       | -         | Artifacts | -   | +  | ±     | -   | +           |
| 9       | Lower pons            | 5            | 4         | Yes       | -         | Artifacts | -   | ±  | ±     | -   | +           |
| 10      | Lower pons            | 4            | 6         | No        | Artifacts | Artifacts | -   | ±  | ±     | -   | +           |
| 11      | Basal ganglia         | 7            | 8         | Yes       | -         | +         | N/A | ±  | N/A   | -   | +           |
| 12      | Occipital WM          | 3            | 3.5       | No        | ±         | ±         | N/A | ±  | N/A   | -   | +           |
| 13      | Insula                | 4            | 5         | Yes       | -         | ±         | ±   | ±  | ±     | -   | +           |
| 14      | Lower pons            | 5            | 5         | No        | -         | Artifacts | -   | ±  | ±     | -   | +           |
| 15      | Pons                  | 17           | 18        | Yes       | -         | +         | -   | +  | ±     | -   | +           |
| 16      | Lower pons            | 4            | 3         | No        | Artifacts | Artifacts | ±   | ±  | N/A   | -   | +           |
| 17      | Lower mid pons        | 3            | 2.5       | No        | ±         | ±         | ±   | +± | N/A   | -   | +           |
| 18      | Left putamen          | 6            | 6         | No        | -         | +         | -   | +  | ±     | -   | +           |
| 19      | Upper pons            | 3            | 3         | No        | ±         | ±         | ±   | +± | ±     | -   | +           |
| 20      | Lower pons            | 11           | 11        | No        | -         | ±         | ±   | +  | +     | -   | +           |
| 21      | Lower pons            | 5            | 5.5       | No        | -         | +         | -   | ±  | N/A   | -   | +           |
| 22      | Lower pons            | 6            | 7         | No        | ±         | Artifacts | ±   | +  | +     | -   | +           |
| 22      | Lower pons            | 4            | 4         | No        | ±         | Artifacts | ±   | +  | +     | -   | +           |
| 23      | Mid pons              | 3            | 4         | No        | ±         | ±         | ±   | ±  | ±     | -   | +           |
| 24      | Upper pons            | 4            | 3         | No        | ±         | ±         | ±   | ±  | ±     | -   | +           |
| 25      | Left putamen          | 4            | 4         | No        | ±         | ±         | +±  | ±  | ±     | -   | +           |
| 26      | Lower pons            | 4            | 4         | Yes       | ±         | ±         | ±   | ±  | ±     | -   | +           |
| 27      | Lower pons            | 2.5          | 3         | No        | ±         | ±         | N/A | ±  | N/A   | -   | +           |

**Note:**—+ indicates hyperintense; ±, isointense; -, hypointense; N/A, not available.

**On-line Table 3: MR imaging of BCT: review of the literature<sup>a</sup>**

| Journal, Year                        | Authors                            | No. of Cases | No. of Lesions | Location                             | Size                                     | Draining Vessels | MR Imaging Sequences               | Follow-Up Imaging                      | Histology                                       | Associated Vascular Malformations                                |
|--------------------------------------|------------------------------------|--------------|----------------|--------------------------------------|------------------------------------------|------------------|------------------------------------|----------------------------------------|-------------------------------------------------|------------------------------------------------------------------|
| <i>AJNR</i> , 1996                   | Barr et al <sup>2</sup>            | 12           | 12             | Pons                                 | 3–17 mm                                  | 8                | T2, T1, T1 + C (12/12), GRE (7/12) | 3 wk–40 mo (mean 11.5 mo)              | N/A                                             | N/A                                                              |
| <i>Radiology</i> , 1997              | Lee et al <sup>1</sup>             | 18           | 19             | Pons 16, medulla 1, supratentorial 2 | 3–20 mm                                  | 3                | T2, T1, T1 + C, GRE (18/18)        | 3–82 mo (median 11 mo, 14 of 18 cases) | N/A                                             | Multiple cavernous angiomas ( <i>n</i> = 2); DVA ( <i>n</i> = 2) |
| <i>J Neuroradiol</i> , 1999          | Auffray-Galvier et al <sup>7</sup> | 7            | 9              | Pons                                 | N/A                                      | 1                | T2, T1, T1 + C, T2* in 5/7 cases   | 6 wk–5 yr (6 of 7 cases)               | N/A                                             | 1 DVA                                                            |
| <i>Eur Radiol</i> , 2000             | Kükler et al <sup>8</sup>          | 4            | 4              | Pons                                 | N/A                                      | 1                | T2, T1, T1 + C, FLAIR              | 2, 4, 6 wk (3 of 4 cases)              | N/A                                             | 1 DVA                                                            |
| <i>AJNR</i> , 2001                   | Castillo et al <sup>24</sup>       | 1            | 1              | Basal ganglia                        | N/A (large)                              | –                | T2, T1, T1 + C, FLAIR              | N/A                                    | Biopsy                                          | N/A                                                              |
| <i>J Comput Assist Tomogr</i> , 2006 | Yoshida et al <sup>6</sup>         | 1            | 1              | Pons                                 | 7 mm                                     | –                | T2, T1, T1 + C, T2*, SWI           | N/A                                    | N/A                                             | N/A                                                              |
| <i>Eur J Radiol</i> , 2010           | Finkenzeller et al <sup>23</sup>   | 18           | 18             | Pons                                 | N/A                                      | 4                | T2, T1, T1 + C, FLAIR, DWI         | N/A                                    | N/A                                             | N/A                                                              |
| <i>Neurol India</i> , 2010           | Pendharkar et al <sup>5</sup>      | 1            | 1              | Pons                                 | N/A                                      | 1                | T1 + C, SWI                        | N/A                                    | N/A                                             | Cavernous angioma ( <i>n</i> = 1)                                |
| <i>J Neurosurg</i> , 2010            | Sayama et al <sup>9</sup>          | 105          | 105            | Supra- and infratentorial BCTs       | Variable, including 7 large (>1 cm) BCTs | N/A              | N/A                                | N/A                                    | Available in 1 case, BCT in right basal ganglia | N/A                                                              |

**Note:**—N/A indicates not available; –, absent; +C, with contrast medium.  
<sup>a</sup>Series  $\geq$  4 cases.
